# Supplementary material for: Normalization of the ATP1A1 Signalosome Rescinds Epigenetic Modifications and Induces Cell Autophagy in Hepatocellular Carcinoma
Source: MDPI journal article supplement (doi:10.3390/cells12192367), 2023-09-27
Supplement: s1 [file s1]

# Normalization of the ATP1A1 Signalosome Rescinds Epigenetic Modifications and Induces Cell Autophagy in MASH-Related Hepatocellular Carcinoma

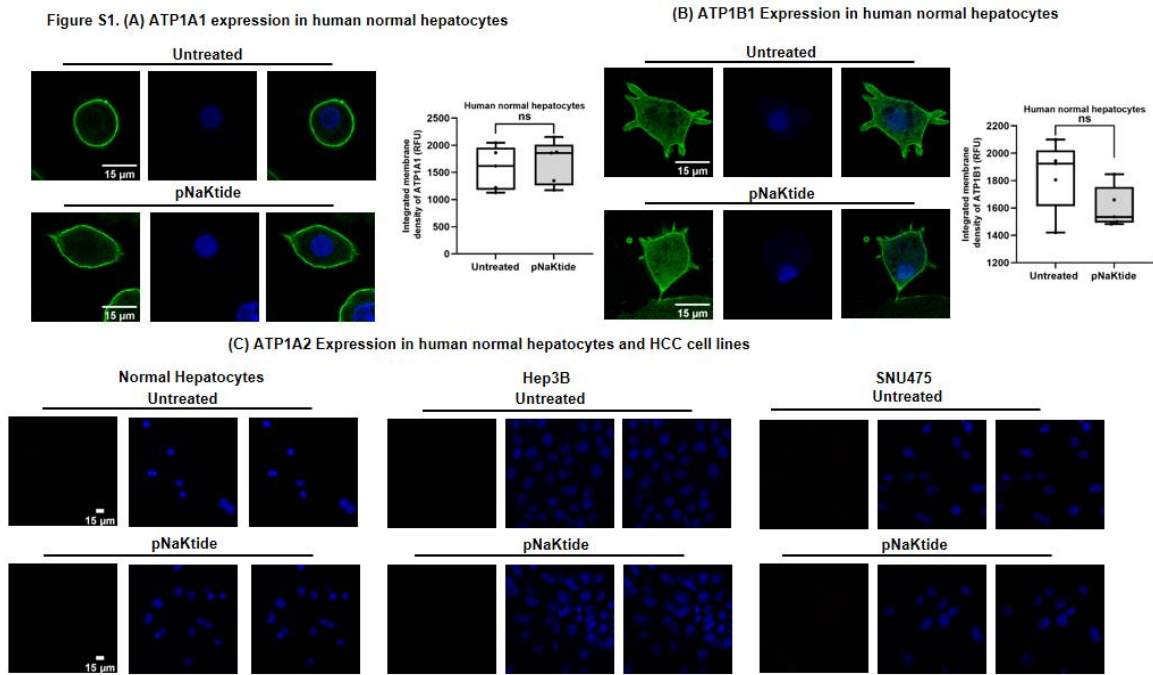

**Figure S1.** *ATPase subunits expression in human normal hepatocytes and two human HCC cell lines. No significant differences were observed in ATP1A1 and ATP1B1 subunits of normal hepatocytes treated with pNaKtide as compared to untreated group. In addition, ATP1A2 subunit of both normal hepatocytes and HCC cell lines showed no significant changes under treated or untreated conditions. A) Confocal images of ATP1A1 expression in human normal hepatocytes. B) Confocal images of ATP1B1 expression in human normal hepatocytes. C) Confocal images of ATP1A2 expressions in human normal hepatocytes and human HCC cell lines (Hep3B and SNU475). Results are shown as box-whisker plots ( $n=5$ , statistical analysis by t-test). Scale bar=15 $\mu$ m.*

**Figure S2. Nuclear vs Cytoplasmic FoxO1 expression in Human Normal Hepatocytes**

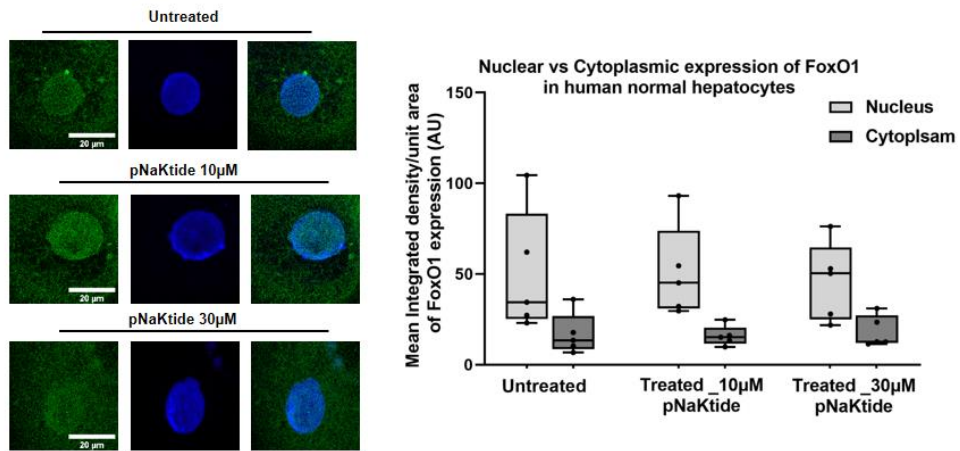

**Figure S2.** *FoxO1* in human normal hepatocytes. No significant changes were observed in the nuclear translocation of FoxO1 in the pNaKtide-treated group when compared to untreated human normal hepatocytes. Confocal microscopy images of FoxO1 in human normal hepatocytes (n=5, Results are shown as box-whisker plots. Statistical analysis by ANOVA and Turkey's Post hoc test). Scale bar=20μm.

**Table S1.** Key reagents and chemicals used in this study. Antibodies against the indicated protein as well as other reagents/chemicals used in this study are as listed below. Their catalogue number, source and the dilutions used in the experiments are as listed.

| ANTIBODY/REAGENT/CHEMICAL                                                     | Source                                    | Reference      | Description                      | Host Sp. | IHC   | ICC/IF | WB     |
|-------------------------------------------------------------------------------|-------------------------------------------|----------------|----------------------------------|----------|-------|--------|--------|
| Histone Extraction Kit                                                        | Abcam                                     | Catt ab113476  | ELISA                            | N/A      | N/A   | N/A    | N/A    |
| Histone H3 (acetyl K9) Quantification Kit (Colorimetric)                      | Abcam                                     | Catt ab115104  | ELISA                            | N/A      | N/A   | N/A    | N/A    |
| Histone H3 (tri-methyl K9) Quantification Kit (Colorimetric)                  | Abcam                                     | Catt ab115064  | ELISA                            | N/A      | N/A   | N/A    | N/A    |
| Anti-Histone H3 (acetyl K9) antibody - ChIP Grade                             | Abcam                                     | Catt ab10812   | Polyclonal                       | Rabbit   | N/A   | 1:700  |        |
| Anti-Histone H3 (tri-methyl K9) antibody - ChIP Grade                         | Abcam                                     | Catt ab8898    | Polyclonal                       | Rabbit   | N/A   | 1:500  | N/A    |
| Autophagy ELISA kit (LC3-II Quantitation)                                     | MYBIOSOURCE                               | MBS169564      | ELISA                            | N/A      | N/A   | N/A    | N/A    |
| BioCell Protein Carbonyl Assay Kit                                            | Biocell Corporation                       | Catt P133      | ELISA                            | N/A      | N/A   | N/A    | N/A    |
| GSH Assay Kit (Colorimetric)                                                  | Abcam                                     | Catt ab239727  | ELISA                            | N/A      | N/A   | N/A    | N/A    |
| alpha 1 Na/K-ATPase                                                           | Millipore                                 | Catt 05-369    | Monoclonal primary               | Mouse    | N/A   | 1:100  | N/A    |
| Anti-Na <sup>+</sup> /K <sup>+</sup> ATPase $\beta$ -1 Antibody, clone C464.8 | Millipore                                 | Catt 05-382    | Monoclonal                       | Mouse    | N/A   | N/A    | 1:1000 |
| FoxO1(C29H4)Rabbit mAb                                                        | Cell Signaling Technologies               | Catt#2880      | Monoclonal                       | Rabbit   | N/A   | N/A    | 1:250  |
| Anti-Alpha 2 Na <sup>+</sup> /K <sup>+</sup> ATPase Antibody                  | Alomone labs                              | Catt ANP-002   | Polyclonal                       | Rabbit   | N/A   | 1:100  | 1:1000 |
| Autophagy ELISA Kit (LC3-II Quantitation)                                     | MYBIOSOURCE                               | Catt MBS169564 | ELISA                            | N/A      | N/A   | N/A    | N/A    |
| Goat Anti-Rabbit IgG H&L (Alexa Fluor® 594)                                   | Abcam                                     | Catt ab150080  | Polyclonal Secondary             | Goat     | 1:500 | 1:100  | N/A    |
| Goat Anti-Rabbit IgG H&L (Alexa Fluor® 488), preabsorbed                      | Abcam                                     | Catt ab150081  | Polyclonal Secondary             | Goat     | N/A   | 1:500  | N/A    |
| Mouse monoclonal antibody anti Na/K-ATPase ( $\alpha$ 6f)                     | Developmental Studies- University of Iowa |                | Monoclonal primary               | Mouse    | N/A   | N/A    | 1:1000 |
| ATP1B1 Monoclonal Antibody (M17-P5-F11)                                       | Invitrogen                                | Catt MA3-930   | Monoclonal                       | Mouse    | N/A   | 1:200  | N/A    |
| Autophagy Assay Kit                                                           | Abcam                                     | Catt ab139484  | Fluorescence/Confocal Microscopy |          | N/A   | N/A    | N/A    |

**Table S2.** List of major genes dysregulated in Hep3B cell line vs. response to pNaKtide treatment.

| Upregulated genes                                                     |             |             |             |                                           |                                    |
|-----------------------------------------------------------------------|-------------|-------------|-------------|-------------------------------------------|------------------------------------|
| Gene Name                                                             | Gene symbol | Adj.p-value | Fold Change | Mean expression<br>Hep3B pNaKtide Treated | Mean expression<br>Hep3B Untreated |
| Activating transcription factor 3                                     | ATF3        | 8.44E-59    | 3.487253    | 3541.213                                  | 315.4904                           |
| Growth arrest and DNA damage inducible alpha                          | GADD45A     | 3.50E-11    | 1.919932    | 1103.418                                  | 291.8637                           |
| Early growth response 1                                               | EGR1        | 0.001097    | 2.938658    | 5863.863                                  | 764.8719                           |
| Early growth response 2                                               | EGR2        | 4.90E-07    | 4.807229    | 67.71237                                  | 2.428744                           |
| Mitogen-activated protein kinase 8 interacting protein 1 pseudogene 2 | MAPK8IP1P2  | 0.002549    | 3.633838    | 141.9453                                  | 11.38391                           |
| Sirtuin 6                                                             | SIRT6       | 0.010402    | 0.651333    | 542.3259                                  | 345.2675                           |
| ENTPD3 antisense RNA 1                                                | ENTPD3-AS1  | 0.007857    | 1.561042    | 35.15685                                  | 11.83365                           |
| Ras related glycolysis inhibitor and calcium channel regulator        | RRAD        | 0.011089    | 2.488686    | 24.51084                                  | 4.328241                           |
| WAP four-disulfide core domain 3                                      | WFDC3       | 1           | 4.379217    | 3.615986                                  | 0                                  |
| Phosphoglycerate mutase family member 4                               | PGAM4       | 1           | 1.732392    | 11.83512                                  | 3.609913                           |
| Downregulated genes                                                   |             |             |             |                                           |                                    |
| Gene Name                                                             | Gene symbol | Adj.p-value | Fold Change | Mean expression<br>Hep3B pNaKtide Treated | Mean expression<br>Hep3B Untreated |
| High mobility group box 1 pseudogene 14                               | HMGB1P14    | 1           | -4.68926    | 0                                         | 4.958786                           |
| Centrosomal protein 290                                               | CEP290      | 0.013149    | -0.82172    | 230.2352                                  | 407.4144                           |
| Zinc finger protein 727                                               | ZNF727      | 1           | -3.317      | 1.310424                                  | 12.65315                           |
| Centromere protein F                                                  | CENPF       | 0.014018    | -0.62986    | 4353.742                                  | 6737.5                             |
| Glypican 6                                                            | GPC6        | 0.015994    | -0.60783    | 1749.369                                  | 2666.319                           |
| Coiled-coil domain containing 87                                      | CCDC87      | 1           | -1.89191    | 3.167282                                  | 11.65714                           |
| WNK lysine deficient protein kinase 1                                 | WNK1        | 0.032694    | -0.74451    | 5697.554                                  | 9545.618                           |
| Ubiquitin specific peptidase 8                                        | USP8        | 0.048214    | -0.43553    | 894.1294                                  | 1210.036                           |
| Cytidine/uridine monophosphate kinase 2                               | CMPK2       | 1           | -4.18654    | 0.175243                                  | 5.230682                           |
| Kinetochore associated 1                                              | KNTC1       | 0.063337    | -0.47438    | 1430.311                                  | 1986.996                           |
